# Supplementary material
Source: PubMed Central journal article supplement (PMC1305343)
Supplement: biophysj_104.052415_1.pdf [file biophysj_104.052415_1.pdf]

**Supplemental material to the manuscript**

*MD simulations indicate a possible role of parallel  $\beta$ -helices*

*in seeded aggregation of poly-Gln*

by

Martina Stork, Armin Giese, Hans A. Kretzschmar, and Paul Tavan

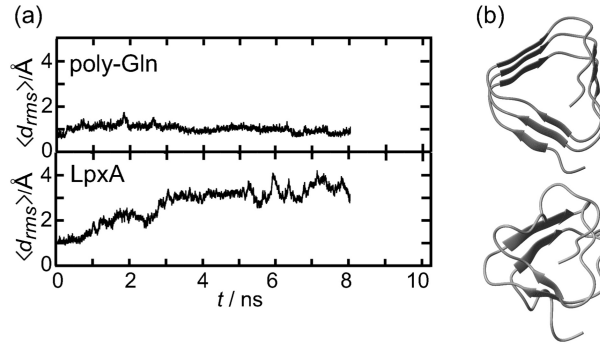

Figure 1: (a) Temporal evolution of the  $\langle d_{rms} \rangle(t)$ -values of the triangular poly-Gln  $\beta$ -helix and the three-coiled LpxA-fragment at an elevated temperature of 330 K. (b) Structures of these three-coiled  $\beta$ -helices after 8 ns.

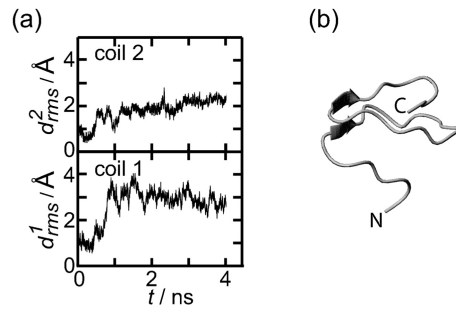

Figure 2: (a)  $d_{rms}^j(t)$ -curves for the various coils  $j$  of a two-coiled *triangular* poly-Gln  $\beta$ -helix. (b) Snapshot after 4 ns.
